# Supplementary material
Source: Springer Nature journal article supplement (https://www.springermedizin.de/resource/supplementary/13054_2013_2881_MOESM1_ESM.pdf/9714108)

LV PRESSURE

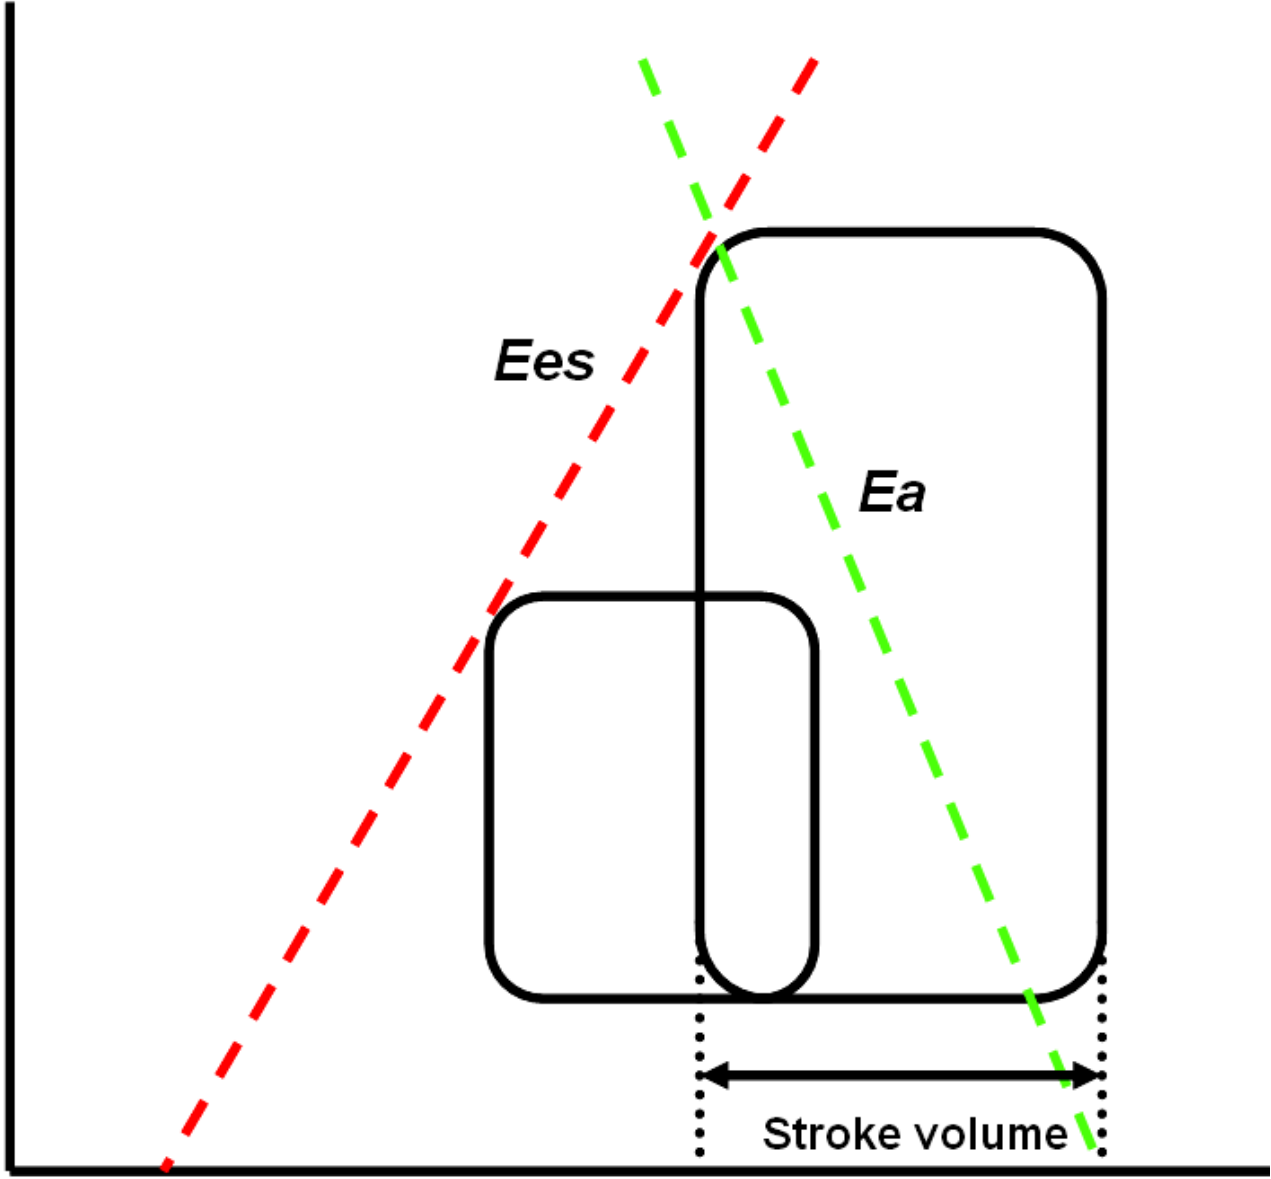

$E_{es}$

$E_a$

Stroke volume

LV VOLUME

Supplement: MOESM1 [file 9714108]
